# Supplementary material for: 1JCH couplings in Group 14/IVA tetramethyls from the gas-phase NMR and DFT structural study: a search for the best computational protocol
Source: Royal Society of Chemistry journal article supplement (doi:10.1039/c4cp01596g), 2014-01-01
Supplement: c4cp01596g1.pdf [file c4cp01596g1.pdf]

## Electronic Supplementary Information

for

# $^1J_{\text{CH}}$ couplings in Group14/IVA tetramethyls from the gas-phase NMR and DFT structural study: a search for the best computational protocol

Ryszard B. Nazarski\*<sup>a</sup> and Włodzimierz Makulski<sup>b</sup>

<sup>a</sup>Laboratory of Molecular Spectroscopy, Faculty of Chemistry, University of Łódź, Tamka 12, 91-403 Łódź, Poland

<sup>b</sup>Laboratory of NMR Spectroscopy, Faculty of Chemistry, University of Warsaw, Pasteura 1, 02-093 Warsaw, Poland

E-mail: nazarski@uni.lodz.pl

### Contents:

|                                                                                                                                                                      |        |
|----------------------------------------------------------------------------------------------------------------------------------------------------------------------|--------|
| <b>Table S1.</b> Selected B3LYP/basis sets combinations tested (two steps considered) .....                                                                          | S2     |
| <b>Table S2.</b> <i>In vacuo</i> computed (protocol II) $r_e$ vs. experimental $r_g$ in all five species $\text{EMe}_4$ .....                                        | S3     |
| <b>Table S3.</b> <i>In vacuo</i> computed (protocol II) $\omega_{\text{as}}(\text{CH}_3)$ vs. gas-phase experimental $\nu_{\text{as}}(\text{CH}_3)$ .....            | S3     |
| <b>Table S4.</b> $^1J_{\text{CHs}}$ in vacuum/ $\text{CCl}_4/\text{C}_6\text{H}_6$ vs. their computed values (including all four Ramsey terms) .....                 | S4     |
| <b>Fig. S1.</b> Dependence of $\Delta^1J_{\text{CH}}^{\text{exp}}$ on the reaction field function of relative permittivity $\epsilon$ .....                          | S5     |
| <b>Fig. S2.</b> Plot of computed (protocol II) $r_e$ bond lengths vs. related experimental $r_g$ distances .....                                                     | S5     |
| <b>Fig. S3.</b> Plot of <i>in vacuo</i> computed (protocol II) $\omega_{\text{as}}(\text{CH}_3)$ s vs. experimental gas-phase $\nu_{\text{as}}(\text{CH}_3)$ s ..... | S6     |
| <b>Fig. S4.</b> The group electronegativity $\chi_g$ vs. experimental $^1J_{0,\text{CH,av}}(\text{gas})$ values .....                                                | S6     |
| <b>Fig. S5.</b> Plot of experimental $^1J_{0,\text{CH,av}}(\text{gas})$ vs. $^2J_{\text{HH}}(\text{CCl}_4)$ values .....                                             | S7     |
| <b>Fig. S6.</b> Plot of the computed (protocol II) H–C–H bond angles vs. experimental $^2J_{\text{HH}}(\text{CCl}_4)$ s .....                                        | S7     |
| <b>Fig. S7.</b> The atom electronegativity $\chi_a$ vs. experimental $^2J_{\text{HH}}(\text{CCl}_4)$ data .....                                                      | S8     |
| <b>Fig. S8.</b> The group electronegativity $\chi_g$ vs. experimental $^2J_{\text{HH}}(\text{CCl}_4)$ data .....                                                     | S8     |
| <b>Tables S5–S9.</b> <i>In vacuo</i> computed (protocol II) Cartesian coordinates/energies for all species $\text{EMe}_4$ ....                                       | S9–S11 |
| <b>References</b> .....                                                                                                                                              | S11    |

**Table S1.** Selected B3LYP/basis sets combinations tested (two steps considered) <sup>a</sup>

| #  | Geometry optimizations   |                             | <i>J</i> -coupling calculations |                             | $R^2$ for $\nu_{\text{as}}(\text{CH}_3)$<br>$= f[\omega_{\text{as}}(\text{CH}_3)]$ | $R^2$ for ${}^1J_{0,\text{CH}}$<br>$= f({}^1J_{\text{CH}}^{\text{theor}})$ | Notes       |
|----|--------------------------|-----------------------------|---------------------------------|-----------------------------|------------------------------------------------------------------------------------|----------------------------------------------------------------------------|-------------|
|    | Basis set for the E atom | Basis set for C and H atoms | Basis set for the E atom        | Basis set for C and H atoms |                                                                                    |                                                                            |             |
| 1  | <b>F</b>                 | <b>D</b>                    | <b>O</b>                        | <b>G</b>                    | 0.9924                                                                             | 0.9650                                                                     | b           |
| 2  | <b>F</b>                 | <b>D</b>                    | <b>O</b>                        | <b>G</b>                    | 0.9929                                                                             | 0.9658                                                                     |             |
| 3  | <b>A</b>                 | <b>D</b>                    | <b>L</b>                        | <b>G</b>                    | 0.9987                                                                             | 0.9690                                                                     | b           |
| 4  | <b>A</b>                 | <b>D</b>                    | <b>L</b>                        | <b>G</b>                    | 0.9973                                                                             | 0.9807                                                                     |             |
| 5  | <b>M</b>                 | <b>M</b>                    | <b>M</b>                        | <b>G</b>                    | 0.9959                                                                             | 0.9783                                                                     |             |
| 6  | <b>A</b>                 | <b>C</b>                    | <b>L</b>                        | <b>G</b>                    | 0.9982                                                                             | 0.9815                                                                     | b, c        |
| 7  | <b>A</b>                 | <b>C</b>                    | <b>M</b>                        | <b>I</b>                    | 0.9994                                                                             | 0.9844                                                                     |             |
| 8  | <b>A</b>                 | <b>C</b>                    | <b>L</b>                        | <b>J</b>                    | 0.9994                                                                             | 0.9845                                                                     |             |
| 9  | <b>A</b>                 | <b>C</b>                    | <b>L</b>                        | <b>G</b>                    | 0.9994                                                                             | 0.9847                                                                     | Protocol I  |
| 10 | <b>B</b>                 | <b>C</b>                    | <b>M</b>                        | <b>I</b>                    | 0.9998                                                                             | 0.9834                                                                     |             |
| 11 | <b>B</b>                 | <b>C</b>                    | <b>M</b>                        | <b>J</b>                    | 0.9998                                                                             | 0.9840                                                                     |             |
| 12 | <b>B</b>                 | <b>C</b>                    | <b>M</b>                        | <b>G</b>                    | 0.9998                                                                             | 0.9879                                                                     | Protocol II |
| 13 | <b>B</b>                 | <b>D</b>                    | <b>M</b>                        | <b>G</b>                    | 0.9970                                                                             | 0.9845                                                                     | b           |
| 14 | <b>B</b>                 | <b>D</b>                    | <b>M</b>                        | <b>G</b>                    | 0.9967                                                                             | 0.9848                                                                     |             |

<sup>a</sup> The gas-phase results for the all five species EMe<sub>4</sub>. <sup>b</sup> The six Cartesian *d* functions have been employed (6D option). <sup>c</sup> Without the keyword 'Int=UltraFine'.

Notation of all basis sets used in this work:

|          |                                               |
|----------|-----------------------------------------------|
| <b>A</b> | def2-TZVPP                                    |
| <b>B</b> | def2-TZVPPD                                   |
| <b>C</b> | 6-31G( <i>d,p</i> )                           |
| <b>D</b> | 6-31+G( <i>d,p</i> )                          |
| <b>E</b> | 6-31+G(2 <i>df,p</i> )                        |
| <b>F</b> | aug-cc-pVTZ <i>or</i> aug-cc-pVTZ-PP (Sn, Pb) |
| <b>G</b> | IGLO-II                                       |
| <b>H</b> | IGLO-III                                      |
| <b>I</b> | aug-cc-pVTZ-J                                 |
| <b>J</b> | pcJ-2                                         |
| <b>K</b> | pcJ-3                                         |
| <b>L</b> | def2-QZVPP                                    |
| <b>M</b> | def2-QZVPPD                                   |
| <b>N</b> | cc-pVQZ <i>or</i> cc-pVQZ-PP (Sn, Pb)         |
| <b>O</b> | aug-cc-pVQZ <i>or</i> aug-cc-pVQZ-PP (Sn, Pb) |

**Table S2.** *In vacuo* computed  $r_e$  vs. experimental  $r_g$  (from the GED data)<sup>a-e</sup> intramolecular distances in all five species EMe<sub>4</sub>, [Å]

|                          | $r_g^{a-e}$          | $r_e^f$ | $r_{e,scal}^{f,g}$ | $r_g - r_{e,scal}$ | $r_{e,lit}^h$ | $r_e - r_{e,lit}$ |
|--------------------------|----------------------|---------|--------------------|--------------------|---------------|-------------------|
| <b>C–C</b> <sup>a</sup>  | 1.537                | 1.536   | 1.540              | -0.003             | 1.537         | -0.001            |
| C–H                      | 1.114                | 1.096   | 1.103              | 0.011              |               |                   |
| 1,3 C··H                 | 2.200                | 2.184   | 2.183              | 0.017              |               |                   |
| C··C                     | 2.508                | 2.508   | 2.505              | 0.003              |               |                   |
| 1,4 C··H                 | 2.767                | 2.761   | 2.756              | 0.011              |               |                   |
| 1,4 C··H                 | 3.480                | 3.474   | 3.463              | 0.017              |               |                   |
| <b>Si–C</b> <sup>b</sup> | 1.877                | 1.882   | 1.884              | -0.007             | 1.896         | -0.014            |
| C–H                      | 1.110                | 1.096   | 1.104              | 0.007              |               |                   |
| Si··H                    | 2.500                | 2.501   | 2.498              | 0.002              |               |                   |
| C··C                     | 3.065                | 3.074   | 3.066              | -0.001             |               |                   |
| 1,4 C··H                 | 3.293                | 3.294   | 3.285              | 0.008              |               |                   |
| 1,4 C··H                 | 4.031                | 4.035   | 4.021              | 0.011              |               |                   |
| <b>Ge–C</b> <sup>c</sup> | 1.958                | 1.976   | 1.977              | -0.019             | 1.969         | 0.007             |
| C–H                      | 1.111                | 1.094   | 1.102              | 0.009              |               |                   |
| Ge··H                    | 2.570                | 2.577   | 2.573              | -0.003             |               |                   |
| C··C                     | 3.198                | 3.226   | 3.218              | -0.020             |               |                   |
| <b>Sn–C</b> <sup>d</sup> | 2.144                | 2.168   | 2.168              | -0.024             | 2.172         | -0.004            |
| C–H                      | 1.118                | 1.094   | 1.101              | 0.017              |               |                   |
| Sn··H                    | 2.764                | 2.749   | 2.744              | 0.020              |               |                   |
| <b>Pb–C</b> <sup>e</sup> | 2.238                | 2.258   | 2.256              | -0.018             | 2.256         | 0.002             |
| C–H                      | 1.083 <sup>i</sup>   | 1.092   | 1.100              | -0.017             |               |                   |
| Pb··H <sup>k</sup>       | [2.721] <sup>j</sup> | [2.817] | [2.807]            | [-0.086]           |               |                   |
| C··C                     | 3.656                | 3.687   | 3.675              | -0.019             |               |                   |

<sup>a</sup> Ref. 1. <sup>b</sup> Ref. 2. <sup>c</sup> Ref. 3. <sup>d</sup> Ref. 4. <sup>e</sup> Ref. 5. <sup>f</sup> This work (protocol II). <sup>g</sup> Corrected (scaled)  $r_e$  values computed with the equation  $r_{e,scal} = (r_e + 0.01584)/1.0076$ ; see also Fig. S2. <sup>h</sup> B3LYP/RESC-derived E–C bond lengths, ref. 6. <sup>i</sup> This  $r_g$  distance seems to be underestimated, in the light of the C–H bond lengths in other species EMe<sub>4</sub>. <sup>j</sup> Most likely strongly underestimated value. <sup>k</sup> This distance was not used in the least squares regression analysis.

**Table S3.** *In vacuo* computed  $\omega_{as}(\text{CH}_3)$  vs. gas-phase experimental  $\nu_{as}(\text{CH}_3)$  (from IR spectra)<sup>a-c</sup> C–H vibrational stretching fundamentals for all five species EMe<sub>4</sub>, [cm<sup>-1</sup>]

| Compound          | $\nu_{as}(\text{CH}_3)^a$ | $\omega_{as}(\text{CH}_3)^d$ | $\omega_{as}(\text{CH}_3)_{scal}^{d,e}$ | $\nu_{as}(\text{CH}_3) - \omega_{as}(\text{CH}_3)_{scal}$ | other $\nu_{as}(\text{CH}_3)$ s      |
|-------------------|---------------------------|------------------------------|-----------------------------------------|-----------------------------------------------------------|--------------------------------------|
| CMe <sub>4</sub>  | 2960.7 <sup>f</sup>       | 3104.93                      | 2960.71                                 | 0.0                                                       | 2962, <sup>b</sup> 2959 <sup>c</sup> |
| SiMe <sub>4</sub> | 2964.2                    | 3109.12                      | 2964.18                                 | 0.0                                                       |                                      |
| GeMe <sub>4</sub> | 2980.6                    | 3128.63                      | 2980.34                                 | 0.3                                                       |                                      |
| SnMe <sub>4</sub> | 2986.5                    | 3136.49                      | 2986.86                                 | -0.4                                                      |                                      |
| PbMe <sub>4</sub> | 3005.0                    | 3158.27                      | 3004.91                                 | 0.1                                                       |                                      |

<sup>a</sup> Ref. 7. <sup>b</sup> Ref. 8. <sup>c</sup> Ref. 9. <sup>d</sup> This work (protocol II). <sup>e</sup> Corrected (scaled)  $\omega_{as}(\text{CH}_3)$  values computed applying the equation  $\omega_{as}(\text{CH}_3)_{scal} = [\omega_{as}(\text{CH}_3) + 468.34]/1.2069$ ; see also Fig. S3. <sup>f</sup> The second (?) value at 2967.5 cm<sup>-1</sup> has also been originally given for this fundamental frequency,<sup>a</sup> which was omitted in the current analysis.

**Table S4.** Computed<sup>a</sup> vs. observed <sup>1</sup>J<sub>CH</sub> couplings for species EMe<sub>4</sub> in vacuum<sup>b</sup> and in CCl<sub>4</sub> or C<sub>6</sub>H<sub>6</sub> solution,<sup>c</sup> together with their decomposition into all four Ramsey terms, [Hz]

| Compound          | Medium                             | FC     | SD   | PSO  | DSO  | Total $J^{\text{theor}}$ | $^1J_{\text{CH}}^{\text{b,c,d}}$ |
|-------------------|------------------------------------|--------|------|------|------|--------------------------|----------------------------------|
| CMe <sub>4</sub>  | gas (I)                            | 119.67 | 0.19 | 0.92 | 0.73 | 121.50                   | 123.93(4)                        |
|                   | gas (II)                           | 119.70 | 0.18 | 0.92 | 0.73 | 121.52                   |                                  |
|                   | CCl <sub>4</sub> (I)               | 119.65 | 0.19 | 0.92 | 0.73 | 121.48                   | 124.0(2)                         |
|                   | CCl <sub>4</sub> (II)              | 119.67 | 0.18 | 0.92 | 0.73 | 121.50                   |                                  |
|                   | C <sub>6</sub> H <sub>6</sub> (II) | 119.67 | 0.18 | 0.92 | 0.73 | 121.50                   |                                  |
| SiMe <sub>4</sub> | gas (I)                            | 114.45 | 0.29 | 1.46 | 0.68 | 116.88                   | 117.88(4)                        |
|                   | gas (II)                           | 114.25 | 0.29 | 1.46 | 0.68 | 116.68                   |                                  |
|                   | CCl <sub>4</sub> (I)               | 114.44 | 0.29 | 1.46 | 0.68 | 116.87                   | 117.8(2)                         |
|                   | CCl <sub>4</sub> (II)              | 114.24 | 0.29 | 1.46 | 0.68 | 116.67                   |                                  |
|                   | C <sub>6</sub> H <sub>6</sub> (II) | 114.24 | 0.29 | 1.46 | 0.68 | 116.66                   |                                  |
| GeMe <sub>4</sub> | gas (I)                            | 120.84 | 0.33 | 1.13 | 0.98 | 123.27                   | 124.05(1)                        |
|                   | gas (II)                           | 120.70 | 0.33 | 1.13 | 0.98 | 123.13                   |                                  |
|                   | CCl <sub>4</sub> (I)               | 120.82 | 0.33 | 1.13 | 0.98 | 123.25                   | 124.6(2)                         |
|                   | CCl <sub>4</sub> (II)              | 120.67 | 0.33 | 1.13 | 0.98 | 123.10                   |                                  |
|                   | C <sub>6</sub> H <sub>6</sub> (II) | 120.67 | 0.33 | 1.13 | 0.98 | 123.10                   |                                  |
| SnMe <sub>4</sub> | gas (I)                            | 124.30 | 0.39 | 1.21 | 0.63 | 126.53                   | 127.13(5)                        |
|                   | gas (II)                           | 124.15 | 0.39 | 1.21 | 0.63 | 126.38                   |                                  |
|                   | CCl <sub>4</sub> (I)               | 124.23 | 0.39 | 1.22 | 0.63 | 126.46                   | 127.8(2)                         |
|                   | CCl <sub>4</sub> (II)              | 124.08 | 0.39 | 1.22 | 0.63 | 126.31                   |                                  |
|                   | C <sub>6</sub> H <sub>6</sub> (II) | 124.08 | 0.39 | 1.22 | 0.63 | 126.31                   |                                  |
| PbMe <sub>4</sub> | gas (I)                            | 130.67 | 0.44 | 1.10 | 0.57 | 132.79                   | 133.29(3)                        |
|                   | gas (II)                           | 130.51 | 0.44 | 1.10 | 0.57 | 132.62                   |                                  |
|                   | CCl <sub>4</sub> (I)               | 130.57 | 0.44 | 1.11 | 0.57 | 132.69                   | 134.3(2)                         |
|                   | CCl <sub>4</sub> (II)              | 130.41 | 0.44 | 1.11 | 0.57 | 132.53                   |                                  |
|                   | C <sub>6</sub> H <sub>6</sub> (II) | 130.41 | 0.44 | 1.11 | 0.57 | 132.53                   |                                  |

<sup>a</sup> Protocol I, II, I-CCl<sub>4</sub>, II-CCl<sub>4</sub>, and II-C<sub>6</sub>H<sub>6</sub> was applied, respectively. <sup>b</sup> The experimental <sup>1</sup>J<sub>0,CH,av</sub> values from Table 1 (in the main text) were used as *in vacuo* data. <sup>c</sup> The data for ~10% CCl<sub>4</sub> solution from <sup>1</sup>H NMR spectra, according to ref. 10. <sup>d</sup> The data for ~10% C<sub>6</sub>H<sub>6</sub> solution from <sup>13</sup>C{<sup>1</sup>H} NMR spectra, according to ref. 11.

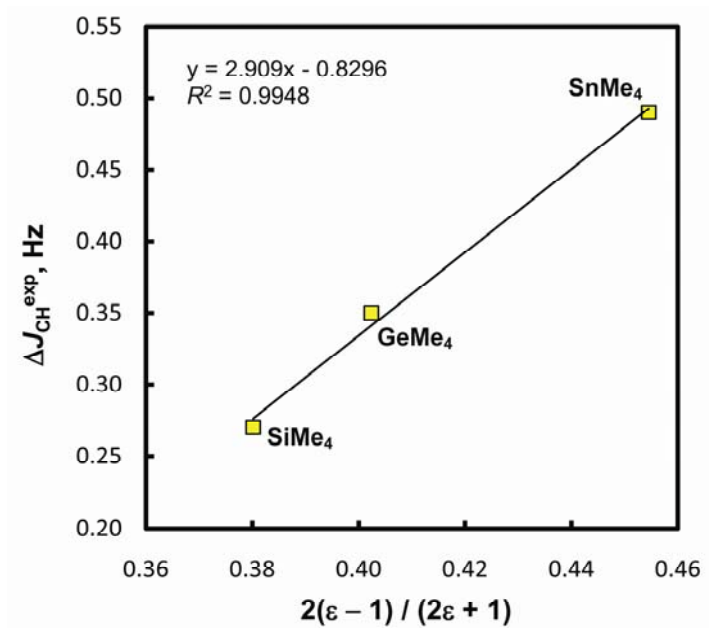

**Fig. S1.** Dependence of  $\Delta^1 J_{CH}^{exp} = {}^1 J_{CH}(\text{neat}) - {}^1 J_{0,CH,av}(\text{gas})$  on the reaction field function of relative permittivity  $\epsilon$  for the three normally liquid tetramethyls;  $J$  data from Table 1 (main text) and  $\epsilon$  values from ref. 12 were used.

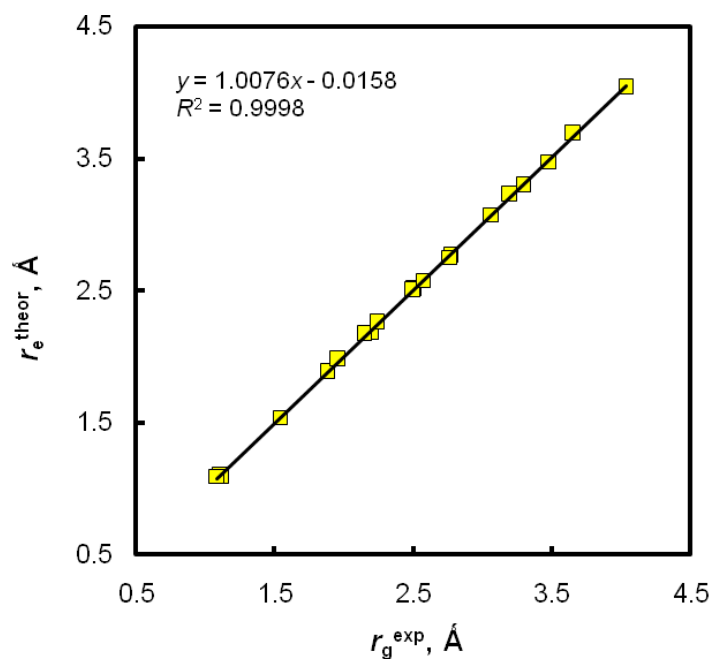

**Fig. S2.** Plot of computed (protocol II)  $r_e$  bond lengths vs. related experimental  $r_g$  distances for all five species EMe<sub>4</sub>; the numeral data from Table S2 were used.

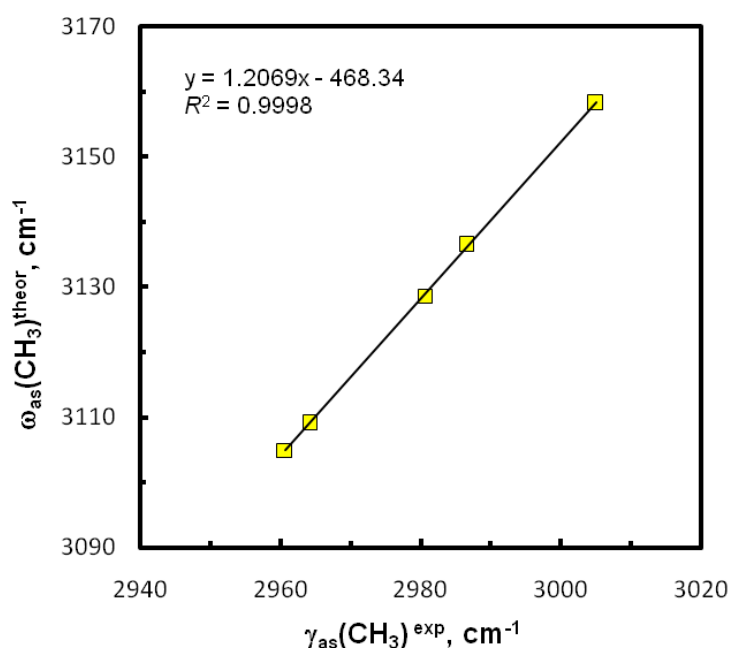

**Fig. S3.** Plot of *in vacuo* computed (protocol II) harmonic  $\omega_{\text{as}}(\text{CH}_3)$ s vs. experimental gas-phase frequencies,  $\nu_{\text{as}}(\text{CH}_3)$ s, for all five species  $\text{EMe}_4$ ; the data from Table S3 were applied.

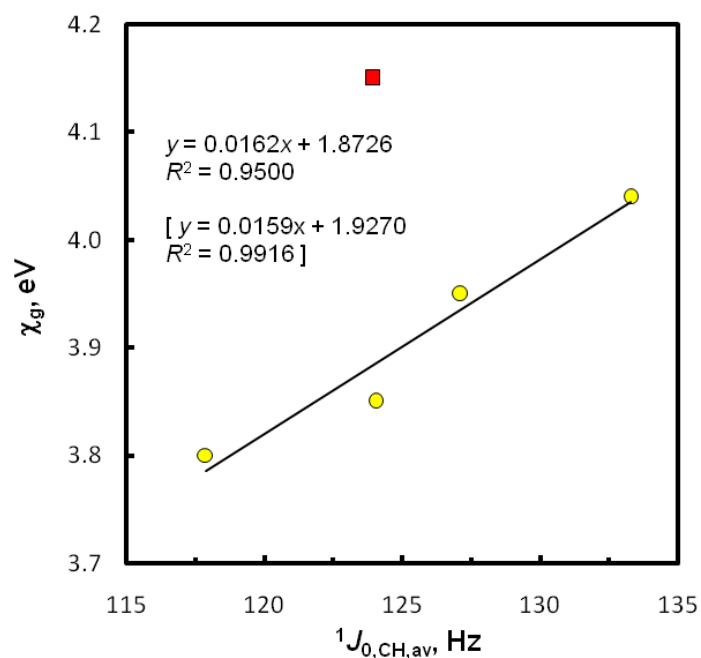

**Fig. S4.** The group electronegativity  $\chi_g$  vs. experimental  ${}^1J_{0,\text{CH,av}}(\text{gas})$  values; the  $\text{CMe}_4$  data point (■) was omitted. Statistics with the  $\chi_g$  corrected for  $\text{GeMe}_4$  (3.88 eV) are in the bracket. The numeral data from Tables 1 and 3 (main text) were used.

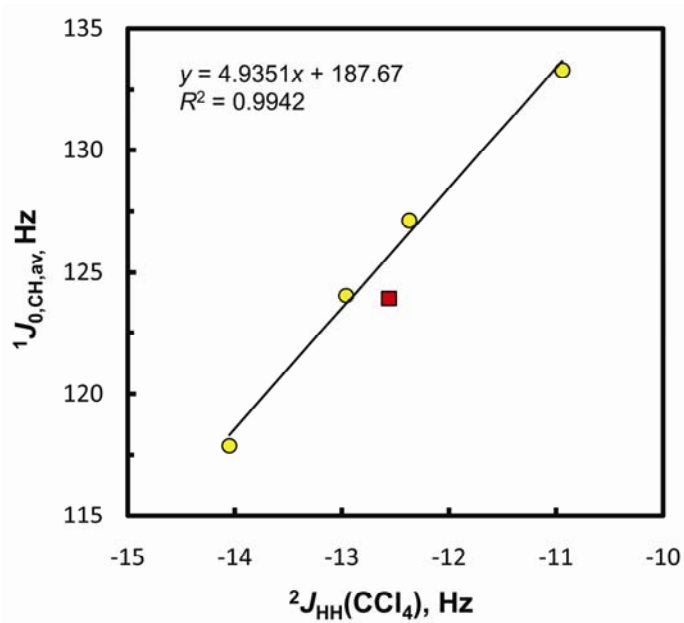

**Fig. S5.** Plot of experimental  ${}^1J_{0,\text{CH,av}}(\text{gas})$  vs.  ${}^2J_{\text{HH}}(\text{CCl}_4)$  values; the CMe<sub>4</sub> point (■) was omitted. The data from Tables 1 and 3 (main text) were applied.

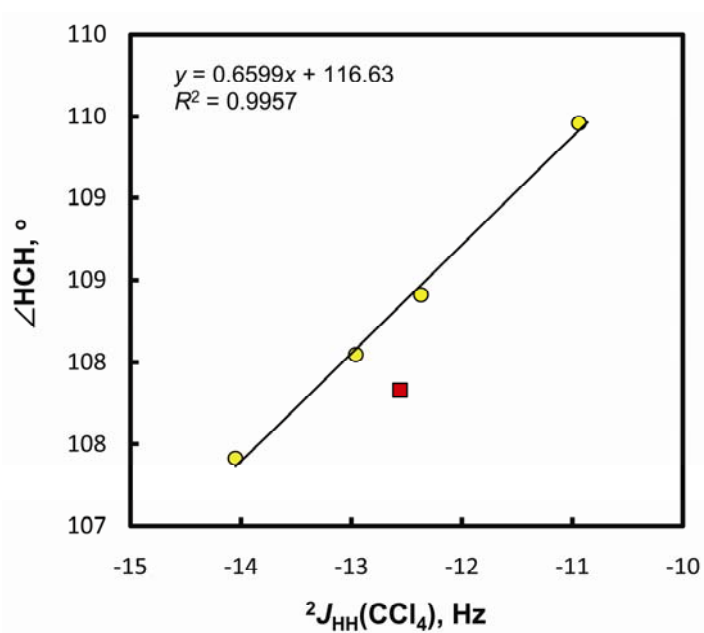

**Fig. S6.** Plot of the computed (protocol II) HCH bond angles vs. experimental  ${}^2J_{\text{HH}}(\text{CCl}_4)$  couplings; the CMe<sub>4</sub> point (■) was omitted. The data from Table 3 (main text) were used.

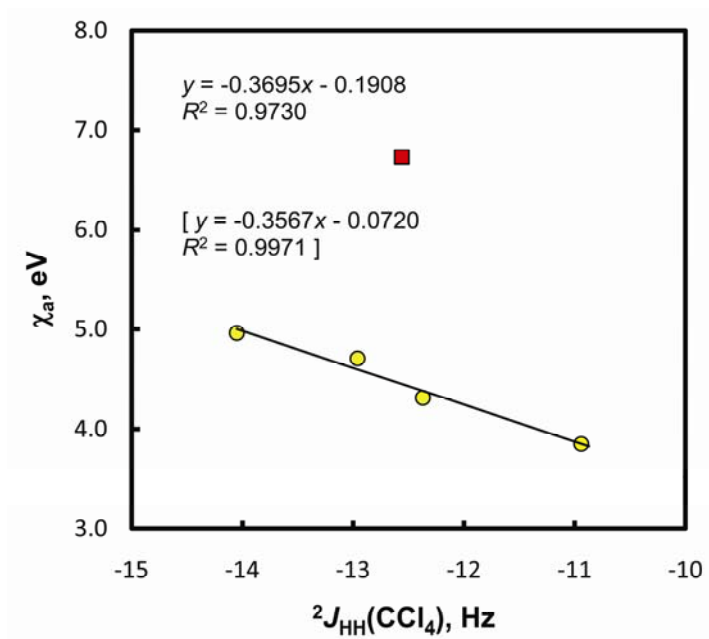

**Fig. S7.** The atom electronegativity  $\chi_a$  vs. experimental  ${}^2J_{\text{HH}}(\text{CCl}_4)$  couplings; the  $\text{CMe}_4$  point (■) was omitted. Statistics with the  $\chi_a$  corrected for Ge (4.54 eV) are in the bracket. The data from Table 3 (main text) were used.

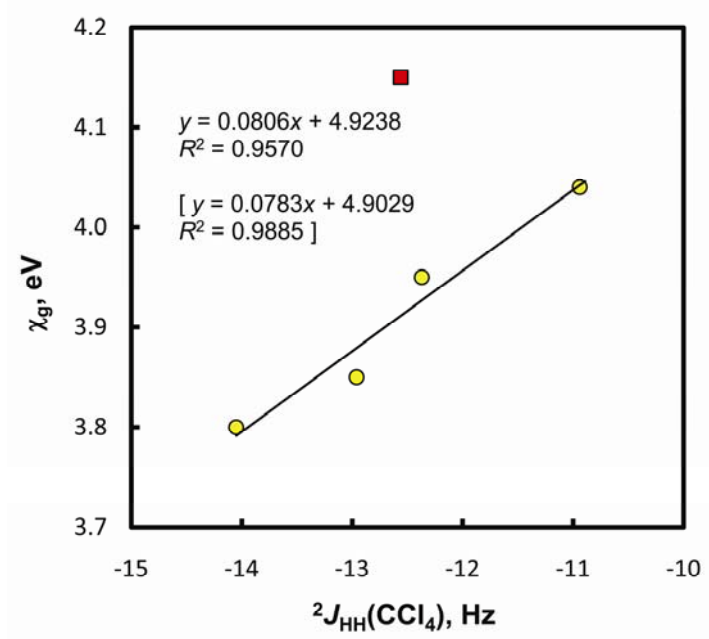

**Fig. S8.** The group electronegativity  $\chi_g$  vs. experimental  ${}^2J_{\text{HH}}(\text{CCl}_4)$  couplings; the  $\text{CMe}_4$  data point (■) was omitted. Statistics with the  $\chi_g$  corrected for  $-\text{GeMe}_3$  (3.88 eV) are in the bracket. The data from Table 3 (main text) were used.



**Table S5.** Cartesian coordinates for **CMe<sub>4</sub>**[*In vacuo*, the protocol II<sup>‡</sup> used, N<sub>imag</sub> = 0, E(RB+HF-LYP)= -197.799809 Ha]

| Center Number | Atomic Number | Atomic Type | Coordinates (Angstroms) |           |           |
|---------------|---------------|-------------|-------------------------|-----------|-----------|
|               |               |             | X                       | Y         | Z         |
| 1             | 6             | 0           | 0.000000                | 0.000000  | 0.000000  |
| 2             | 6             | 0           | 0.886699                | 0.886699  | 0.886699  |
| 3             | 6             | 0           | -0.886699               | -0.886699 | 0.886699  |
| 4             | 6             | 0           | -0.886699               | 0.886699  | -0.886699 |
| 5             | 6             | 0           | 0.886699                | -0.886699 | -0.886699 |
| 6             | 1             | 0           | 1.531597                | 1.531597  | 0.279146  |
| 7             | 1             | 0           | 0.279146                | 1.531597  | 1.531597  |
| 8             | 1             | 0           | 1.531597                | 0.279146  | 1.531597  |
| 9             | 1             | 0           | -1.531597               | -1.531597 | 0.279146  |
| 10            | 1             | 0           | -1.531597               | 0.279146  | -1.531597 |
| 11            | 1             | 0           | 0.279146                | -1.531597 | -1.531597 |
| 12            | 1             | 0           | -0.279146               | -1.531597 | 1.531597  |
| 13            | 1             | 0           | -1.531597               | -0.279146 | 1.531597  |
| 14            | 1             | 0           | -1.531597               | 1.531597  | -0.279146 |
| 15            | 1             | 0           | -0.279146               | 1.531597  | -1.531597 |
| 16            | 1             | 0           | 1.531597                | -0.279146 | -1.531597 |
| 17            | 1             | 0           | 1.531597                | -1.531597 | -0.279146 |

<sup>‡</sup> B3LYP/6-31G(*d,p*)(C,H)def2-TZVPPD(E)**Table S6.** Cartesian coordinates for **SiMe<sub>4</sub>**[*In vacuo*, the protocol II used, N<sub>imag</sub> = 0, E(RB+HF-LYP)= -449.2407721 Ha]

| Center Number | Atomic Number | Atomic Type | Coordinates (Angstroms) |           |           |
|---------------|---------------|-------------|-------------------------|-----------|-----------|
|               |               |             | X                       | Y         | Z         |
| 1             | 14            | 0           | 0.000000                | 0.000000  | 0.000000  |
| 2             | 6             | 0           | 0.000000                | 0.000000  | 1.882286  |
| 3             | 6             | 0           | 1.774636                | 0.000000  | -0.627429 |
| 4             | 6             | 0           | -0.887318               | -1.536880 | -0.627429 |
| 5             | 6             | 0           | -0.887318               | 1.536880  | -0.627429 |
| 6             | 1             | 0           | -1.020116               | 0.000000  | 2.283291  |
| 7             | 1             | 0           | 0.510058                | -0.883446 | 2.283291  |
| 8             | 1             | 0           | 0.510058                | 0.883446  | 2.283291  |
| 9             | 1             | 0           | 1.812669                | 0.000000  | -1.722872 |
| 10            | 1             | 0           | -0.906335               | -1.569817 | -1.722872 |
| 11            | 1             | 0           | -0.906335               | 1.569817  | -1.722872 |
| 12            | 1             | 0           | 2.322727                | 0.883446  | -0.280210 |
| 13            | 1             | 0           | 2.322727                | -0.883446 | -0.280210 |
| 14            | 1             | 0           | -0.396277               | -2.453264 | -0.280210 |
| 15            | 1             | 0           | -1.926450               | -1.569817 | -0.280210 |
| 16            | 1             | 0           | -1.926450               | 1.569817  | -0.280210 |
| 17            | 1             | 0           | -0.396277               | 2.453264  | -0.280210 |

**Table S7.** Cartesian coordinates for **GeMe<sub>4</sub>**

[*In vacuo*, the protocol II used,  $N_{\text{imag}} = 0$ ,  $E(\text{RB+HF-LYP}) = -2236.7460606$  Ha]

| Center<br>Number | Atomic<br>Number | Atomic<br>Type | Coordinates (Angstroms) |           |           |
|------------------|------------------|----------------|-------------------------|-----------|-----------|
|                  |                  |                | X                       | Y         | Z         |
| 1                | 32               | 0              | 0.000000                | 0.000000  | 0.000000  |
| 2                | 6                | 0              | 0.000000                | 0.000000  | 1.975809  |
| 3                | 6                | 0              | 1.862810                | 0.000000  | -0.658603 |
| 4                | 6                | 0              | -0.931405               | -1.613241 | -0.658603 |
| 5                | 6                | 0              | -0.931405               | 1.613241  | -0.658603 |
| 6                | 1                | 0              | -1.022618               | 0.000000  | 2.365508  |
| 7                | 1                | 0              | 0.511309                | -0.885613 | 2.365508  |
| 8                | 1                | 0              | 0.511309                | 0.885613  | 2.365508  |
| 9                | 1                | 0              | 1.889349                | 0.000000  | -1.752636 |
| 10               | 1                | 0              | -0.944675               | -1.636224 | -1.752636 |
| 11               | 1                | 0              | -0.944675               | 1.636224  | -1.752636 |
| 12               | 1                | 0              | 2.400658                | 0.885613  | -0.306436 |
| 13               | 1                | 0              | 2.400658                | -0.885613 | -0.306436 |
| 14               | 1                | 0              | -0.433366               | -2.521837 | -0.306436 |
| 15               | 1                | 0              | -1.967292               | -1.636224 | -0.306436 |
| 16               | 1                | 0              | -1.967292               | 1.636224  | -0.306436 |
| 17               | 1                | 0              | -0.433366               | 2.521837  | -0.306436 |

**Table S8.** Cartesian coordinates for **SnMe<sub>4</sub>**

[*In vacuo*, the protocol II used,  $N_{\text{imag}} = 0$ ,  $E(\text{RB+HF-LYP}) = -374.045353$  Ha]

| Center<br>Number | Atomic<br>Number | Atomic<br>Type | Coordinates (Angstroms) |           |           |
|------------------|------------------|----------------|-------------------------|-----------|-----------|
|                  |                  |                | X                       | Y         | Z         |
| 1                | 50               | 0              | 0.000000                | 0.000000  | 0.000000  |
| 2                | 6                | 0              | 0.000000                | 0.000000  | 2.168123  |
| 3                | 6                | 0              | 2.044126                | 0.000000  | -0.722708 |
| 4                | 6                | 0              | -1.022063               | -1.770265 | -0.722708 |
| 5                | 6                | 0              | -1.022063               | 1.770265  | -0.722708 |
| 6                | 1                | 0              | -1.024413               | 0.000000  | 2.551411  |
| 7                | 1                | 0              | 0.512207                | -0.887168 | 2.551411  |
| 8                | 1                | 0              | 0.512207                | 0.887168  | 2.551411  |
| 9                | 1                | 0              | 2.064022                | 0.000000  | -1.816296 |
| 10               | 1                | 0              | -1.032011               | -1.787495 | -1.816296 |
| 11               | 1                | 0              | -1.032011               | 1.787495  | -1.816296 |
| 12               | 1                | 0              | 2.576228                | 0.887168  | -0.367557 |
| 13               | 1                | 0              | 2.576228                | -0.887168 | -0.367557 |
| 14               | 1                | 0              | -0.519804               | -2.674663 | -0.367557 |
| 15               | 1                | 0              | -2.056424               | -1.787495 | -0.367557 |
| 16               | 1                | 0              | -2.056424               | 1.787495  | -0.367557 |
| 17               | 1                | 0              | -0.519804               | 2.674663  | -0.367557 |

**Table S9.** Cartesian coordinates for **PbMe<sub>4</sub>**

[In vacuo, the protocol II used,  $N_{\text{imag}} = 0$ ,  $E(\text{RB+HF-LYP}) = -352.5624235$  Ha]

| Center Number | Atomic Number | Atomic Type | Coordinates (Angstroms) |           |           |
|---------------|---------------|-------------|-------------------------|-----------|-----------|
|               |               |             | X                       | Y         | Z         |
| 1             | 82            | 0           | 0.000000                | 0.000000  | 0.000000  |
| 2             | 6             | 0           | 0.000000                | 0.000000  | 2.257628  |
| 3             | 6             | 0           | 2.128512                | 0.000000  | -0.752543 |
| 4             | 6             | 0           | -1.064256               | -1.843346 | -0.752543 |
| 5             | 6             | 0           | -1.064256               | 1.843346  | -0.752543 |
| 6             | 1             | 0           | -1.029569               | 0.000000  | 2.621891  |
| 7             | 1             | 0           | 0.514785                | -0.891633 | 2.621891  |
| 8             | 1             | 0           | 0.514785                | 0.891633  | 2.621891  |
| 9             | 1             | 0           | 2.128753                | 0.000000  | -1.844651 |
| 10            | 1             | 0           | -1.064376               | -1.843554 | -1.844651 |
| 11            | 1             | 0           | -1.064376               | 1.843554  | -1.844651 |
| 12            | 1             | 0           | 2.643538                | 0.891633  | -0.388620 |
| 13            | 1             | 0           | 2.643538                | -0.891633 | -0.388620 |
| 14            | 1             | 0           | -0.549592               | -2.735187 | -0.388620 |
| 15            | 1             | 0           | -2.093946               | -1.843554 | -0.388620 |
| 16            | 1             | 0           | -2.093946               | 1.843554  | -0.388620 |
| 17            | 1             | 0           | -0.549592               | 2.735187  | -0.388620 |

**References:**

- 1 L. S. Bartell and W. F. Bradford, *J. Mol. Struct.*, 1977, **37**, 113–126.
- 2 A. R. Campanelli, F. Ramondo, A. Domenicano and I. Hargittai, *Struct. Chem.*, 2000, **11**, 155–160.
- 3 E. Csákvári, B. Rozsondai and I. Hargittai, *J. Mol. Struct.*, 1991, **245**, 349–355.
- 4 M. Nagashima, H. Fuji and M. Kimura, *Bull. Chem. Soc. Jpn.*, 1973, **46**, 3708–3711.
- 5 T. Oyamada, T. Iijima and M. Kimura, *Bull. Chem. Soc. Jpn.*, 1971, **44**, 2638–2642.
- 6 W. Lie, D. G. Fedorov and K. Hirao, *J. Phys. Chem. A*, 2002, **106**, 7057–7061.
- 7 H. Bürger and S. Biedermann, *Spectrochim. Acta A*, 1972, **28**, 2283–2286.
- 8 C. W. Young, J. S. Koehler and D. S. McKinney, *J. Am. Chem. Soc.*, 1947, **69**, 1410–1415.
- 9 E. R. Shull, T. S. Oakwood and D. H. Rank, *J. Chem. Phys.*, 1953, **21**, 2024–2029.
- 10 M. J. Lacey, C. G. Macdonald, A. Pross, J. S. Shannon and S. Sternhell, *Aust. J. Chem.*, 1970, **23**, 1421–1429.
- 11 F. J. Weigert, M. Winokur and J. D. Roberts, *J. Am. Chem. Soc.*, 1968, **90**, 1566–1569.
- 12 S. Geer and R. A. Holroyd, *Phys. Rev. B*, 1992, **46**, 5043–5046.
